# Supplementary material for: Comparative Mitogenome Analyses of Subgenera and Species Groups in Epeorus (Ephemeroptera: Heptageniidae)
Source: MDPI journal article supplement (doi:10.3390/insects13070599), 2022-06-30
Supplement: s1 [file s1]

**Table S5** Primers for mitogenomes of *Epeorus* used in this study

| Fragment                                       | Primer   | Primer sequences                 | Reference |
|------------------------------------------------|----------|----------------------------------|-----------|
| Part of COI                                    | LCO1490  | 5'-GGTCAACAAATCATAAAGATATTGG-3'  | [29]      |
|                                                | HCO2198  | 5'-TAAACTTCAGGGTGACCAAAAAATCA-3' |           |
| Part of rrnL                                   | 16Sa     | 5'-GCCTGTTTATCAAAAACAT-3'        | [30]      |
|                                                | 16Sb     | 5'-CTCCGGTTTGAAGTCAGATCA-3'      |           |
| Fragment of<br>block (I-M-<br>Q-M/NCR-<br>ND2) | 1-ND2-F  | 5'-GATGCCTGACAAAAGGGCTAC-3'      | This work |
|                                                | 1-ND2-R  | 5'-GGCTCAAAGGTAAGAGGCGA-3'       |           |
|                                                | 2-ND2-F  | 5'-TGCCTGACAAAAGGGCTACTT-3'      |           |
|                                                | 2-ND2-R  | 5'-CAAAGGGTTCAGGGGCTCAT-3'       |           |
|                                                | 3-ND2-F  | 5'-CAAAGGGTTCAGGGGCTCAT-3'       |           |
|                                                | 3-ND2-R  | 5'-TGGTTTGTGTGGTCAGGCTTA-3'      |           |
|                                                | 4-ND2-F  | 5'-TGAAATGCCTGATAAAAGGACTACT-3'  |           |
|                                                | 4-ND2-R  | 5'-CCCAGTCAAGCTCCCATTCA-3'       |           |
|                                                | 5-ND2-F  | 5'-ATGAAATGCCTGATAAAAGGACTAC-3'  |           |
|                                                | 5-ND2-R  | 5'-TATGGCAATGCTAAGGGGCA-3'       |           |
|                                                | 6-ND2-F  | 5'-ATGAAATGCCTGATAAAAGGACTAC-3'  |           |
|                                                | 6-ND2-R  | 5'-AAAAGGACGGCGGAAGCTAA-3'       |           |
|                                                | 7-ND2-F  | 5'-TGAAATGCCTGATAAAAGGGTTAC-3'   |           |
|                                                | 7-ND2-R  | 5'-AGCAAGGGCCTGTGTAAGAA-3'       |           |
|                                                | 8-ND2-F  | 5'-TGCCTGATTAAAGGGCTACTTTG-3'    |           |
|                                                | 8-ND2-R  | 5'-GGTAGTGCGCCCGTAAATCT-3'       |           |
|                                                | 9-ND2-F  | 5'-TAGATCATGTAGGCCACCCT-3'       |           |
|                                                | 9-ND2-R  | 5'-CAAGCCAAGCACCCATTCAT-3'       |           |
|                                                | 10-ND2-F | 5'-ATCATGTAGGGTTCCTACTTTTCATT-3' |           |
|                                                | 10-ND2-R | 5'-AGAAGTGAAAAGGGGCTGCTC-3'      |           |
|                                                | 11-ND2-F | 5'-TAAGGAAAGATAAGCTAACTGCAAG-3'  |           |
|                                                | 11-ND2-R | 5'-CCTAGCCATGCTCCTAACCAA-3'      |           |
|                                                | 12-ND2-F | 5'-TCATGTAGGGTTCCTACTTTTCATT-3'  |           |
|                                                | 12-ND2-R | 5'-AAGCTGCCTCGGTAGCAAAT-3'       |           |
|                                                | 13-ND2-R | 5'-TGAAATGCCTGATAAAAGGACTACT-3'  |           |
|                                                | 13-ND2-R | 5'-AGTCAAGCTCCCATTTCAGGA-3'      |           |
|                                                | 14-ND2-R | 5'-CATGTAGGCCTCCCTACTTTTCAT-3'   |           |
|                                                | 14-ND2-R | 5'-TCCAAACCTAACCAAGCACCT-3'      |           |
|                                                | 15-ND2-R | 5'-ATGAAATGCCTGATAAAAGGGCT-3'    |           |
|                                                | 15-ND2-R | 5'-GCGAGAGCTTGGGTGAGAAA-3'       |           |
