# Supplementary material for: Comparative Mitogenome Analyses of Subgenera and Species Groups in Epeorus (Ephemeroptera: Heptageniidae)
Source: MDPI journal article supplement (doi:10.3390/insects13070599), 2022-06-30
Supplement: s1 [file s1]

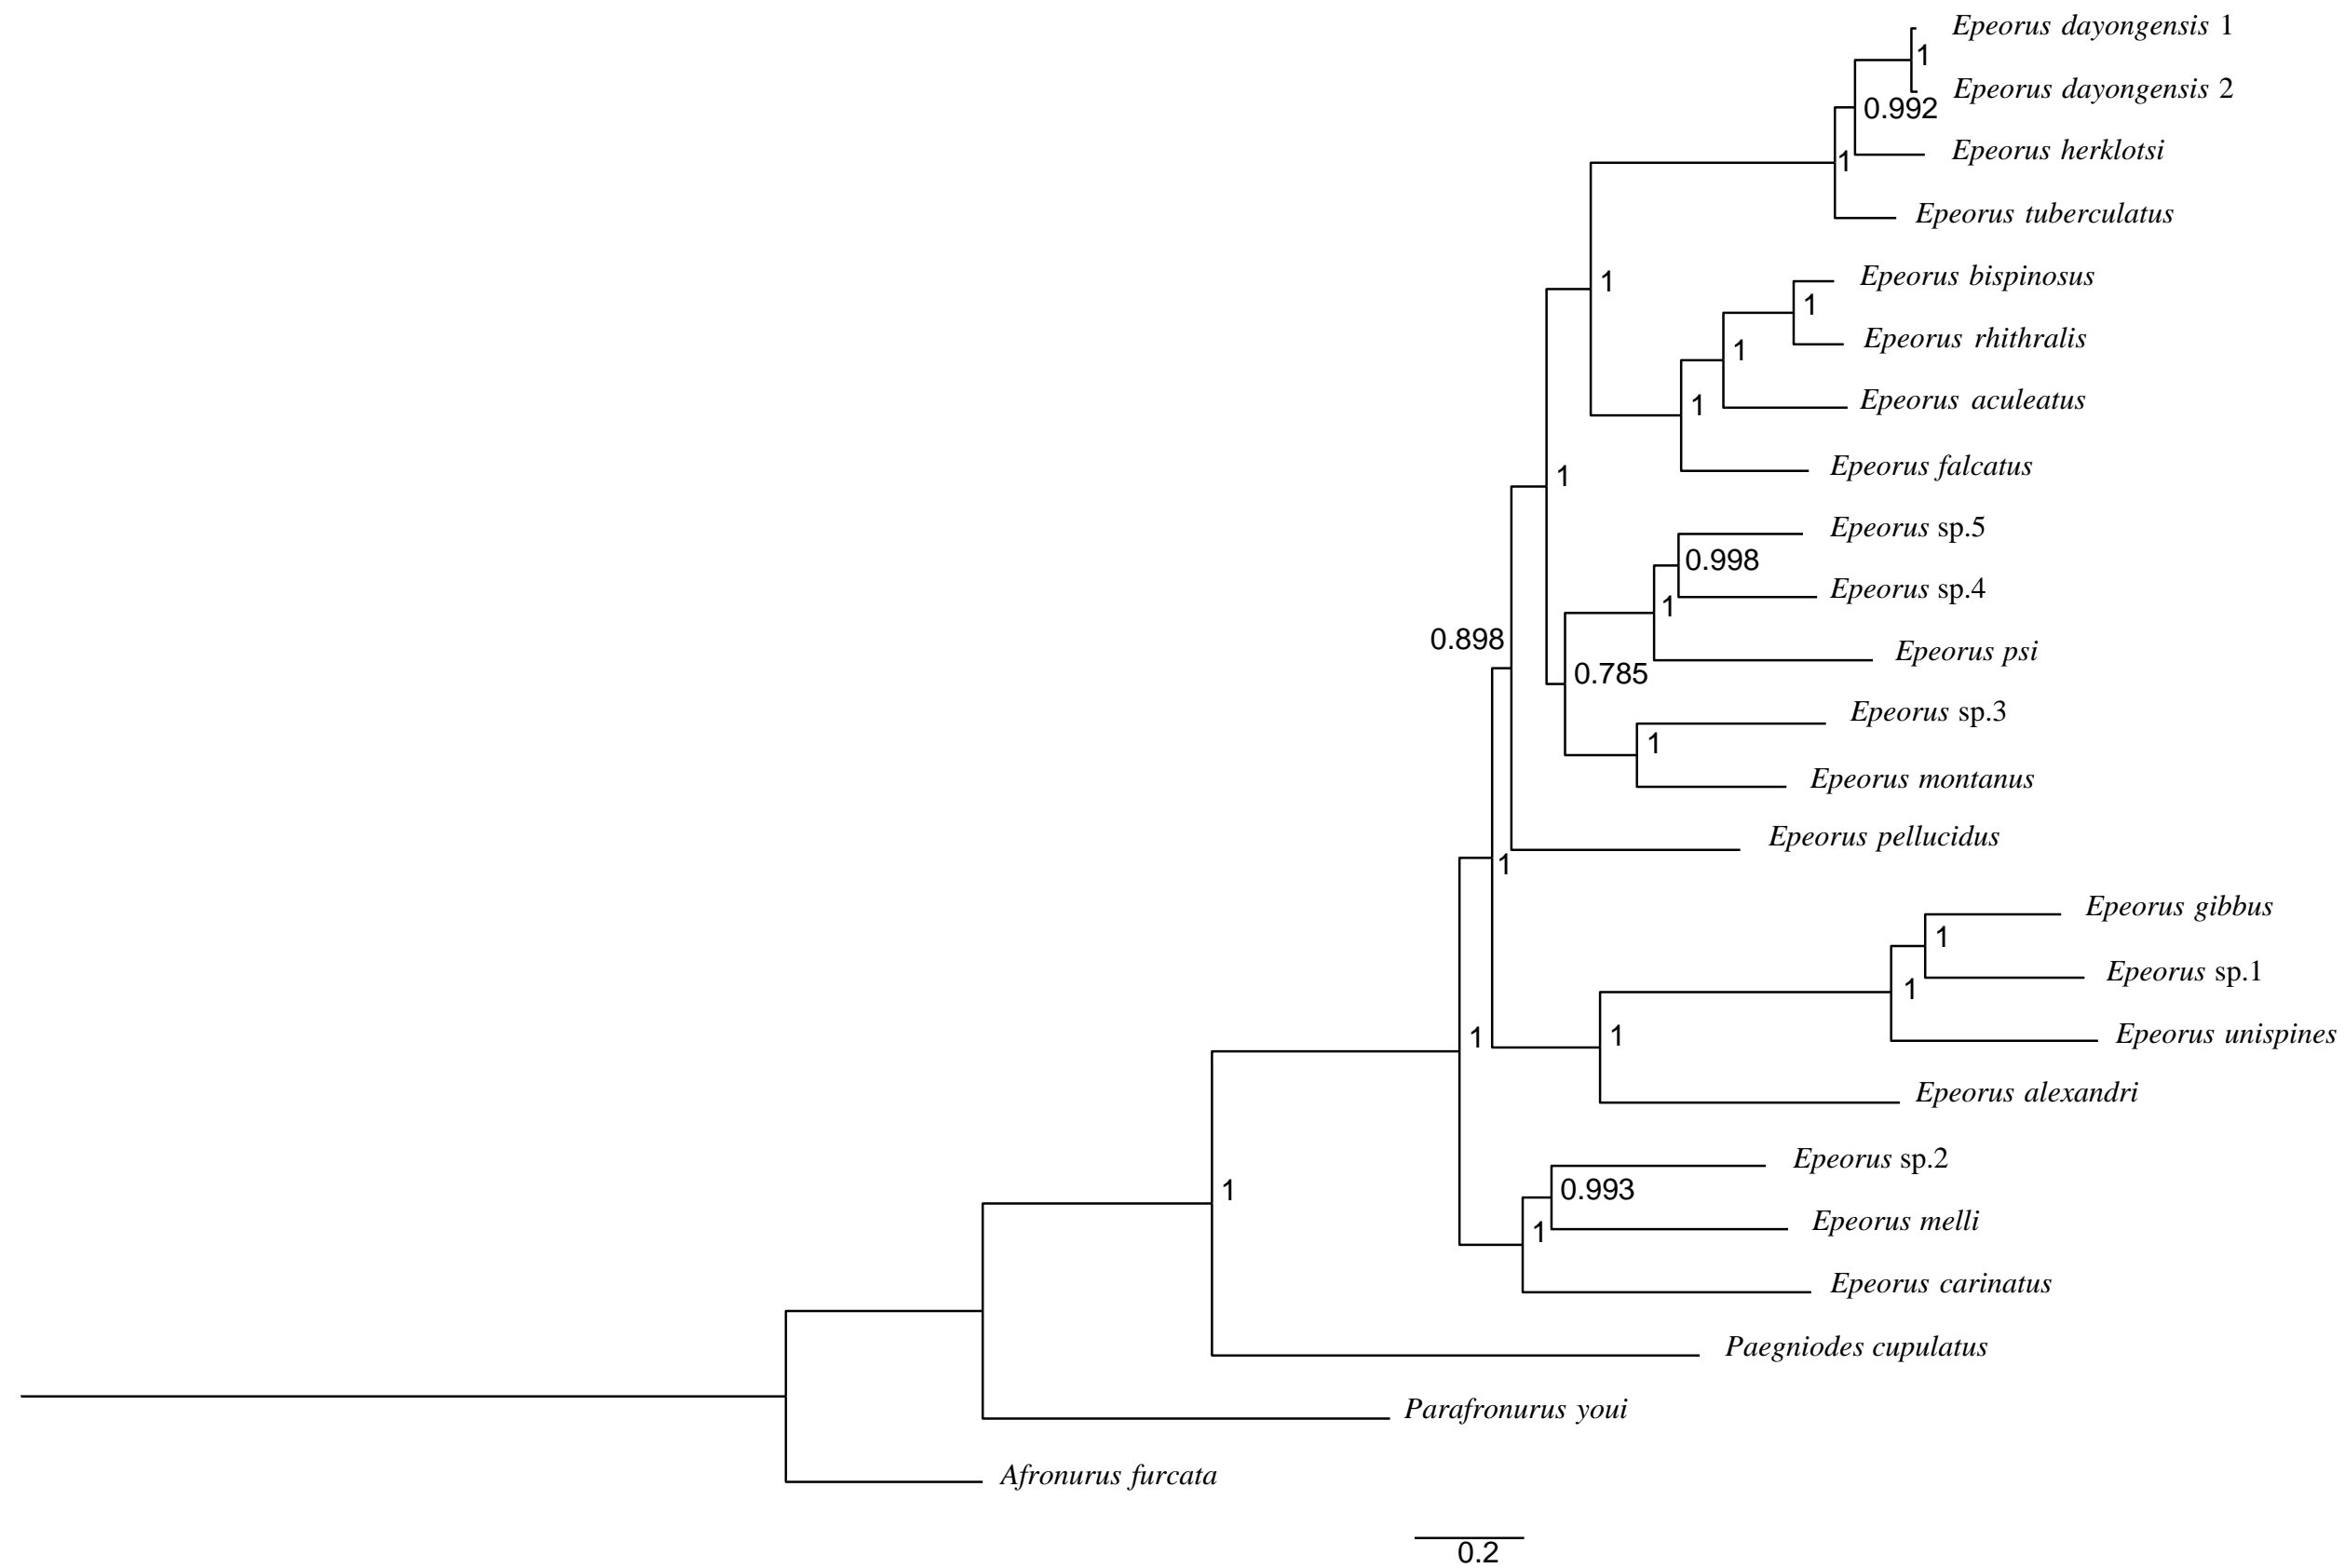

**Figure S1:** Phylogenetic relationships of *Epeorus* constructed by BI method based on datasets PR, node numbers represent the values of posterior probability;
