# Supplementary material for: Comparative Mitogenome Analyses of Subgenera and Species Groups in Epeorus (Ephemeroptera: Heptageniidae)
Source: MDPI journal article supplement (doi:10.3390/insects13070599), 2022-06-30
Supplement: s1 [file s1]

**Table S7** Partition schemes and best-fitting models selected in PR dataset.

| Nucleotide sequence alignment |                                                                 |            |
|-------------------------------|-----------------------------------------------------------------|------------|
| Partition                     | Partition name                                                  | Best model |
| 1                             | ATP6_codon1, COIII_codon1, COII_codon1, Cytb_codon1             | SYM+G      |
| 2                             | COI_codon2, COIII_codon2, COII_codon2, Cytb_codon2, ATP6_codon2 | GTR+I      |
| 3                             | COI_codon3, ATP6_codon3, COII_codon3, ATP8_codon3               | HKY+I+G    |
| 4                             | ND3_codon1, ATP8_codon1, ND2_codon1, ND6_codon1                 | HKY+I+G    |
| 5                             | ATP8_codon2, ND2_codon2, ND6_codon2                             | GTR+I+G    |
| 6                             | COI_codon1                                                      | SYM+G      |
| 7                             | COIII_codon3, Cytb_codon3, ND2_codon3, ND3_codon3, ND6_codon3   | GTR+I+G    |
| 8                             | ND4L_codon1, ND1_codon1, ND5_codon1, ND4_codon1                 | GTR+I+G    |
| 9                             | ND4L_codon2, ND1_codon2, ND4_codon2, ND5_codon2, ND3_codon2     | GTR+I+G    |
| 10                            | ND4L_codon3, ND1_codon3, ND4_codon3, ND5_codon3                 | GTR+G      |
| 11                            | rrnaS, rrnaL                                                    | GTR+I+G    |
