# Supplementary material for: Comparative Mitogenome Analyses of Subgenera and Species Groups in Epeorus (Ephemeroptera: Heptageniidae)
Source: MDPI journal article supplement (doi:10.3390/insects13070599), 2022-06-30
Supplement: s1 [file s1]

**Table S3** Start and stop codons of 13 PCGs

| <b>Species</b>                | <b>Genes</b> |                 |                 |             |              |             |            |                 |                 |            |             |                |                 |
|-------------------------------|--------------|-----------------|-----------------|-------------|--------------|-------------|------------|-----------------|-----------------|------------|-------------|----------------|-----------------|
|                               | <b>ATP6</b>  | <b>ATP8</b>     | <b>COI</b>      | <b>COII</b> | <b>COIII</b> | <b>CYTB</b> | <b>ND1</b> | <b>ND2</b>      | <b>ND3</b>      | <b>ND4</b> | <b>ND4L</b> | <b>ND5</b>     | <b>ND6</b>      |
| <i>Epeorus gibbus</i>         | ATA/TAA      | ATG/TAA         | ATT/TAA         | ATG/T*      | ATG/TAA      | ATG/T*      | ATG/TAA    | ATG/TAA         | <b>ATC</b> /TAG | ATG/T*     | ATG/TAA     | <b>ATG</b> /T* | ATT/TAA         |
| <i>Epeorus unispinosus</i>    | ATA/TAA      | ATG/TAA         | ATT/ <b>TAG</b> | ATG/T*      | ATG/TAA      | ATG/TAG     | ATG/TAA    | ATG/TAA         | ATT/TAG         | ATG/T*     | ATG/TAA     | GTG/T*         | <b>TTG</b> /TAA |
| <i>Epeorus</i> sp.1           | ATA/TAA      | ATG/TAA         | ATT/TAA         | ATG/T*      | ATG/TAA      | ATG/TAG     | ATG/TAA    | ATG/TAA         | <b>ATC</b> /TAG | ATG/T*     | ATG/TAA     | GTG/T*         | <b>ATG</b> /TAA |
| <i>Epeorus aculeatus</i>      | ATA/TAA      | <b>GTG</b> /TAA | ATT/TAA         | ATG/T*      | ATG/TAA      | ATG/TAG     | ATG/TAA    | ATG/TAA         | ATT/TAG         | ATG/T*     | ATG/TAA     | GTG/T*         | ATT/TAA         |
| <i>Epeorus bispinosus</i>     | ATA/TAA      | ATG/TAA         | ATT/TAA         | ATG/T*      | ATG/TAA      | ATG/TAG     | ATG/TAA    | ATG/TAA         | ATT/TAG         | ATG/T*     | ATG/TAA     | GTG/T*         | ATT/TAA         |
| <i>Epeorus rhithralis</i>     | ATA/TAA      | <b>GTG</b> /TAA | ATT/TAA         | ATG/T*      | ATG/TAA      | ATG/TAG     | ATG/TAA    | ATG/TAA         | ATT/TAG         | ATG/T*     | ATG/TAA     | GTG/T*         | ATT/TAA         |
| <i>Epeorus falcatus</i>       | ATA/TAA      | ATG/TAA         | ATT/TAA         | ATG/T*      | ATG/TAA      | ATG/TAG     | ATG/TAA    | ATG/TAA         | ATT/TAG         | ATG/T*     | ATG/TAA     | GTG/T*         | ATT/TAA         |
| <i>Epeorus melli</i>          | ATA/TAA      | ATG/TAA         | ATT/TAA         | ATG/T*      | ATG/TAA      | ATG/TAG     | ATG/TAA    | ATG/TAA         | <b>ATG</b> /TAG | ATG/T*     | ATG/TAA     | GTG/T*         | ATT/TAA         |
| <i>Epeorus</i> sp.2           | ATA/TAA      | ATG/TAA         | ATT/TAA         | ATG/T*      | ATG/TAA      | ATG/TAG     | ATG/TAA    | ATG/TAA         | <b>ATG</b> /TAG | ATG/T*     | ATG/TAA     | GTG/T*         | ATT/TAA         |
| <i>Epeorus carinatus</i>      | ATA/TAA      | <b>GTG</b> /TAA | ATT/TAA         | ATG/T*      | ATG/TAA      | ATG/TAG     | ATG/TAA    | ATG/TAA         | <b>ATG</b> /TAG | ATG/T*     | ATG/TAA     | GTG/T*         | ATT/TAA         |
| <i>Epeorus pellucidus</i>     | ATA/TAA      | ATG/TAA         | ATT/TAA         | ATG/T*      | ATG/TAA      | ATG/TAG     | ATG/TAA    | ATG/TAA         | ATT/TAG         | ATG/T*     | ATG/TAA     | GTG/T*         | ATT/TAA         |
| <i>Epeorus alexandri</i>      | ATA/TAA      | ATG/TAA         | ATT/TAA         | ATG/T*      | ATG/TAA      | ATG/TAG     | ATG/TAA    | ATG/TAA         | <b>ATC</b> /TAG | ATG/T*     | ATG/TAA     | GTG/T*         | ATT/TAA         |
| <i>Epeorus montanus</i>       | ATA/TAA      | ATG/TAA         | ATT/TAA         | ATG/T*      | ATG/TAA      | ATG/TAG     | ATG/TAA    | ATG/TAA         | ATT/TAG         | ATG/T*     | ATG/TAA     | GTG/T*         | ATT/TAA         |
| <i>Epeorus</i> sp.3           | ATA/TAA      | ATG/TAA         | ATT/TAA         | ATG/T*      | ATG/TAA      | ATG/TAG     | ATG/TAA    | ATG/TAA         | ATT/TAG         | ATG/T*     | ATG/TAA     | GTG/T*         | ATT/TAA         |
| <i>Epeorus herklotsi</i>      | ATA/TAA      | <b>GTG</b> /TAA | ATT/TAA         | ATG/T*      | ATG/TAA      | ATG/TAG     | ATG/TAA    | ATG/TAA         | ATT/TAG         | ATG/T*     | ATG/TAA     | GTG/T*         | ATT/TAA         |
| <i>Epeorus dayongensis</i> 01 | ATA/TAA      | <b>GTG</b> /TAA | ATT/TAA         | ATG/T*      | ATG/TAA      | ATG/TAG     | ATG/TAA    | ATG/TAA         | <b>ATC</b> /TAG | ATG/T*     | ATG/TAA     | GTG/T*         | ATT/TAA         |
| <i>Epeorus dayongensis</i> 02 | ATA/TAA      | <b>GTG</b> /TAA | ATT/TAA         | ATG/T*      | ATG/TAA      | ATG/TAG     | ATG/TAA    | ATG/TAA         | <b>ATC</b> /TAG | ATG/T*     | ATG/TAA     | GTG/T*         | ATT/TAA         |
| <i>Epeorus tuberculatus</i>   | ATA/TAA      | <b>GTG</b> /TAA | ATT/TAA         | ATG/T*      | ATG/TAA      | ATG/TAG     | ATG/TAA    | ATG/TAA         | <b>ATC</b> /TAG | ATG/T*     | ATG/TAA     | GTG/T*         | ATT/TAA         |
| <i>Epeorus psi</i>            | ATA/TAA      | ATG/TAA         | ATT/TAA         | ATG/T*      | ATG/TAA      | ATG/TAG     | ATG/TAA    | <b>GTG</b> /TAA | ATT/TAG         | ATG/T*     | ATG/TAA     | GTG/T*         | ATT/TAA         |
| <i>Epeorus</i> sp.4           | ATA/TAA      | ATG/TAA         | ATT/TAA         | ATG/T*      | ATG/TAA      | ATG/TAG     | ATG/TAA    | ATG/TAA         | ATT/TAG         | ATG/T*     | ATG/TAA     | GTG/T*         | ATT/TAA         |
| <i>Epeorus</i> sp.5           | ATA/TAA      | ATG/TAA         | ATT/TAA         | ATG/T*      | ATG/TAA      | ATG/TAG     | ATG/TAA    | ATG/TAA         | ATT/TAG         | ATG/T*     | ATG/TAA     | GTG/T*         | ATT/TAA         |
