# Supplementary material for: Comparative Mitogenome Analyses of Subgenera and Species Groups in Epeorus (Ephemeroptera: Heptageniidae)
Source: MDPI journal article supplement (doi:10.3390/insects13070599), 2022-06-30
Supplement: s1 [file s1]

**Table S1** Collection information of *Epeorus* species in this study

| No. | Species                     | Country | Province       | Location                              | Date         |
|-----|-----------------------------|---------|----------------|---------------------------------------|--------------|
| 1   | <i>Epeorus gibbus</i>       | China   | Zhejiang       | Hangzhou City, Tianmu Mountain        | 2019-IV-5    |
| 2   | <i>Epeorus unispinosus</i>  | China   | Zhejiang       | Hangzhou City, Tianmu Mountain        | 2021-IV-5    |
| 3   | <i>Epeorus</i> sp.1         | China   | Zhejiang       | Hangzhou City, Tianmu Mountain        | 2020-IV-4    |
| 4   | <i>Epeorus aculeatus</i>    | China   | Yunnan         | Pingbian County                       | 2020-X-18    |
| 5   | <i>Epeorus bispinosus</i>   | China   | Yunnan         | Gaoligongshan National Nature Reserve | 2020-VIII-20 |
| 6   | <i>Epeorus rhithralis</i>   | China   | Yunnan         | Jinping County                        | 2020-X-20    |
| 7   | <i>Epeorus</i> sp.2         | China   | Jiangxi        | Jiulianshan National Nature Reserve   | 2020-IX-16   |
| 8   | <i>Epeorus alexandri</i>    | China   | Inner Mongolia | Arxan                                 | 2014-VIII-25 |
| 9   | <i>Epeorus</i> sp.3         | China   | Tibet          | Lengjiaqu                             | 2020-IX-16   |
| 10  | <i>Epeorus herklotsi</i>    | China   | Zhejiang       | Hangzhou City, Tianmu Mountain        | 2020-IV-05   |
| 11  | <i>Epeorus dayongensis</i>  | China   | Guangxi        | Huaping National Nature Reserve       | 2020-VIII-20 |
| 12  | <i>Epeorus tuberculatus</i> | China   | Zhejiang       | Lishui City, Jingning County          | 2020-VIII-10 |
| 13  | <i>Epeorus psi</i>          | China   | Yunan          | Wenshan City                          | 2020-X-17    |
| 14  | <i>Epeorus</i> sp.4         | China   | Yunan          | Nujiang River                         | 2019-X-15    |
| 15  | <i>Epeorus</i> sp.5         | China   | Yunan          | Nujiang River                         | 2020-IX-20   |
